# Supplementary material for: Stabilization of CO2 as zwitterionic carbamate within a coordination polymer (CP): synthesis, structure and anion sensing behaviour of a Tb-CP composite
Source: Royal Society of Chemistry journal article supplement (doi:10.1039/d2ce00711h), 2022-01-01
Supplement: d2ce00711h1.pdf [file d2ce00711h1.pdf]

## **Stabilization of CO<sub>2</sub> as Zwitterionic Carbamate within a Coordination Polymer (CP): Synthesis, Structure and Anions Sensing Behaviour of Tb-CP composite**

Sourav Sarkar,<sup>a</sup> Debal Kanti Singha,<sup>a,b</sup> Prakash Majee,<sup>b</sup> Pooja Daga,<sup>b</sup> Sudip Kumar Mondal<sup>b\*</sup>  
and Partha Mahata<sup>a\*</sup>

<sup>a</sup>Department of Chemistry, Jadavpur University, Kolkata-700032, India. Email: [parthachem@gmail.com](mailto:parthachem@gmail.com)

<sup>b</sup>Department of Chemistry, Siksha-Bhavana, Visva-Bharati University, Santiniketan-731235, West Bengal,  
India. Email: [sudip.mondal@visva-bharati.ac.in](mailto:sudip.mondal@visva-bharati.ac.in)

**ELECTRONIC SUPPLEMENTARY INFORMATION**

Table S1: Selected bond angles observed in [Gd(3,5-pydc)<sub>1.5</sub>(CO<sub>2</sub>)<sub>0.5</sub>(H<sub>2</sub>O)<sub>4</sub>].3H<sub>2</sub>O, **1**.

| Angle              | Amplitude (°) | Angle               | Amplitude (°) |
|--------------------|---------------|---------------------|---------------|
| O(5)-Gd(1)-O(9)    | 71.91(13)     | O(5)-Gd(1)-O(8)     | 127.16(14)    |
| O(5)-Gd(1)-O(10)   | 135.42(12)    | O(9)-Gd(1)-O(8)     | 73.32(15)     |
| O(9)-Gd(1)-O(10)   | 78.61(13)     | O(10)-Gd(1)-O(8)    | 71.91(13)     |
| O(5)-Gd(1)-O(11)   | 144.03(13)    | O(11)-Gd(1)-O(8)    | 72.02(15)     |
| O(9)-Gd(1)-O(11)   | 141.96(13)    | O(1)-Gd(1)-O(8)     | 143.62(14)    |
| O(10)-Gd(1)-O(11)  | 76.19(13)     | O(5)-Gd(1)-O(3)#1   | 75.68(13)     |
| O(5)-Gd(1)-O(1)    | 89.19(13)     | O(9)-Gd(1)-O(3)#1   | 98.04(12)     |
| O(9)-Gd(1)-O(1)    | 127.62(13)    | O(10)-Gd(1)-O(3)#1  | 142.31(12)    |
| O(10)-Gd(1)-O(1)   | 83.00(12)     | O(11)-Gd(1)-O(3)#1  | 85.29(14)     |
| O(11)-Gd(1)-O(1)   | 76.77(13)     | O(1)-Gd(1)-O(3)#1   | 124.55(11)    |
| O(8)-Gd(1)-O(3)#1  | 71.23(13)     | O(5)-Gd(1)-O(4)#1   | 73.11(12)     |
| O(9)-Gd(1)-O(4)#1  | 138.59(12)    | O(10)-Gd(1)-O(4)#1  | 142.80(12)    |
| O(11)-Gd(1)-O(4)#1 | 71.13(12)     | O(1)-Gd(1)-O(4)#1   | 72.76(11)     |
| O(8)-Gd(1)-O(4)#1  | 112.90(13)    | O(3)#1-Gd(1)-O(4)#1 | 51.79(10)     |
| O(5)-Gd(1)-O(2)    | 71.73(12)     | O(9)-Gd(1)-O(2)     | 76.14(12)     |
| O(10)-Gd(1)-O(2)   | 69.20(11)     | O(11)-Gd(1)-O(2)    | 119.42(13)    |
| O(1)-Gd(1)-O(2)    | 51.48(11)     | O(8)-Gd(1)-O(2)     | 134.21(13)    |
| O(3)#1-Gd(1)-O(2)  | 147.10(12)    | O(4)#1-Gd(1)-O(2)   | 112.63(10)    |

Symmetry transformations used to generate equivalent atoms: #1 x,-y+1,z-1/2

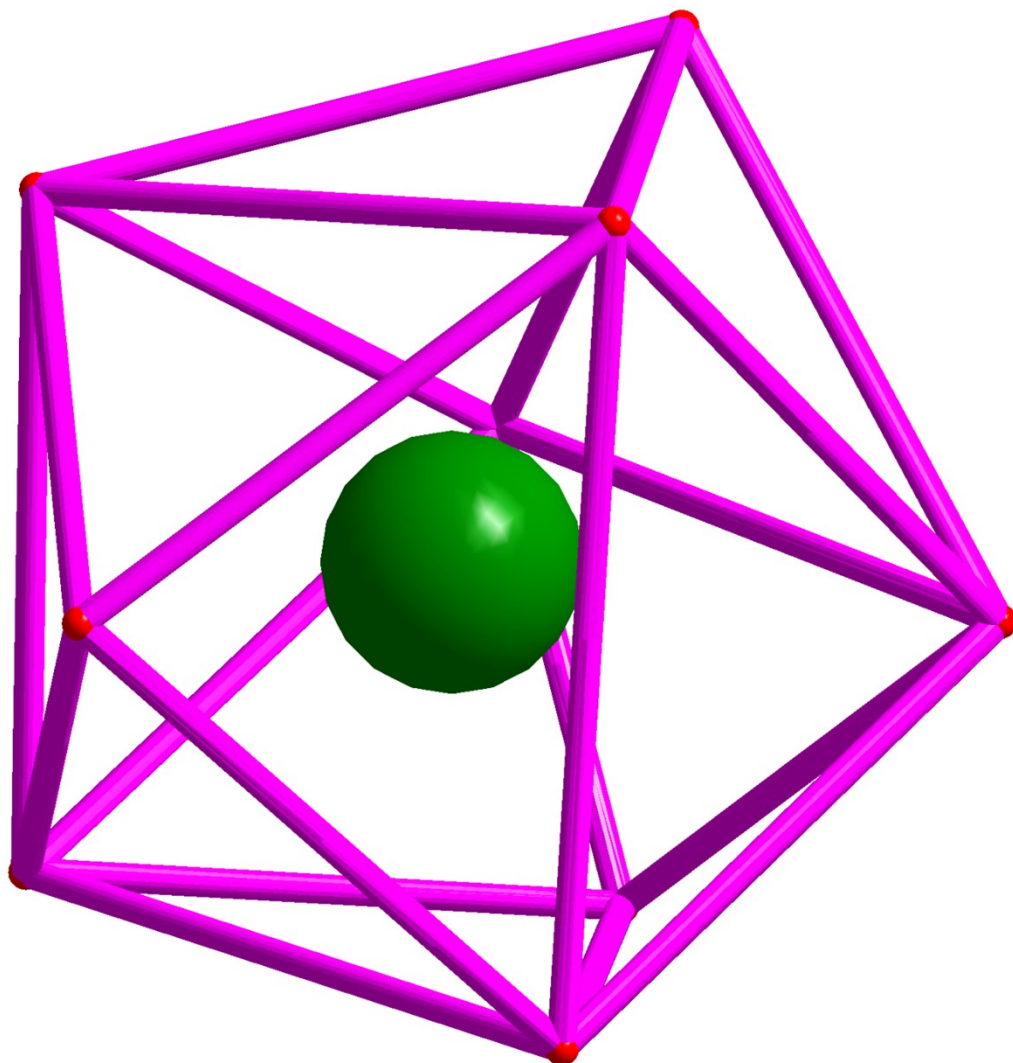

Fig. S1. Figure shows nine coordinated polyhedral unit  $[\text{GdO}_9]$  with distorted tricapped trigonal prismatic geometry in  $[\text{Gd}(3,5\text{-pydc})_{1.5}(\text{CO}_2)_{0.5}(\text{H}_2\text{O})_4] \cdot 3\text{H}_2\text{O}$ , **1**.

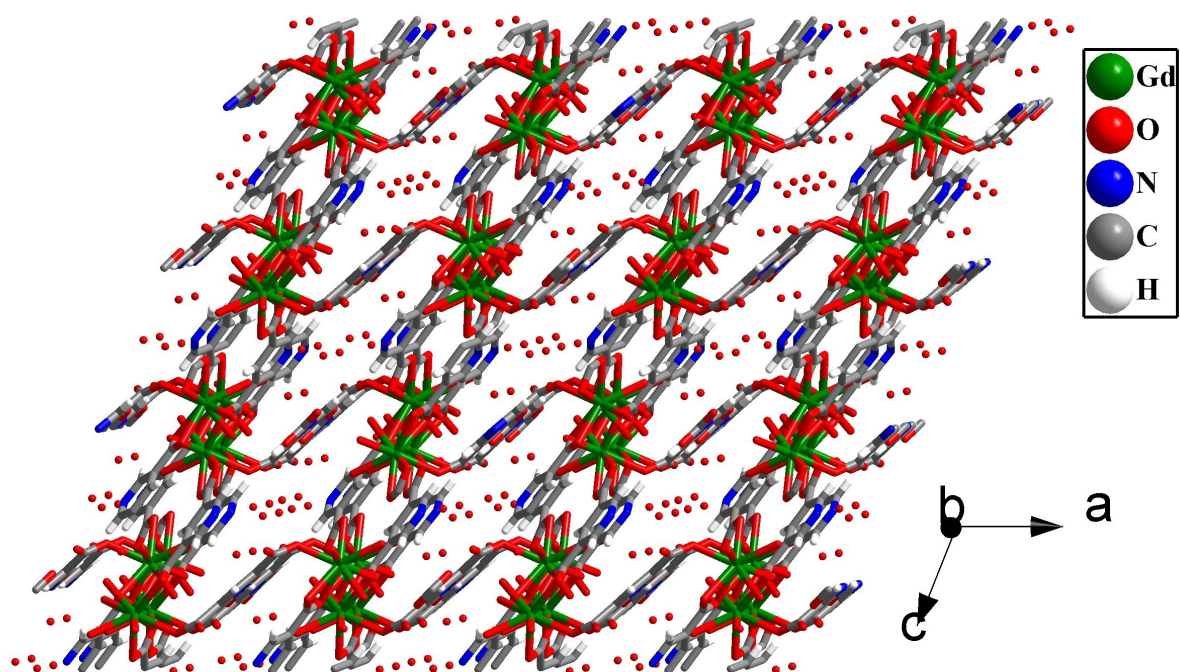

Fig. S2. Figure shows three-dimensional supra-molecular structure stabilized through hydrogen bond interactions involving coordinated water molecules in  $[\text{Gd}(\text{3,5-pydc})_{1.5}(\text{CO}_2)_{0.5}(\text{H}_2\text{O})_4] \cdot 3\text{H}_2\text{O}$ , **1**.

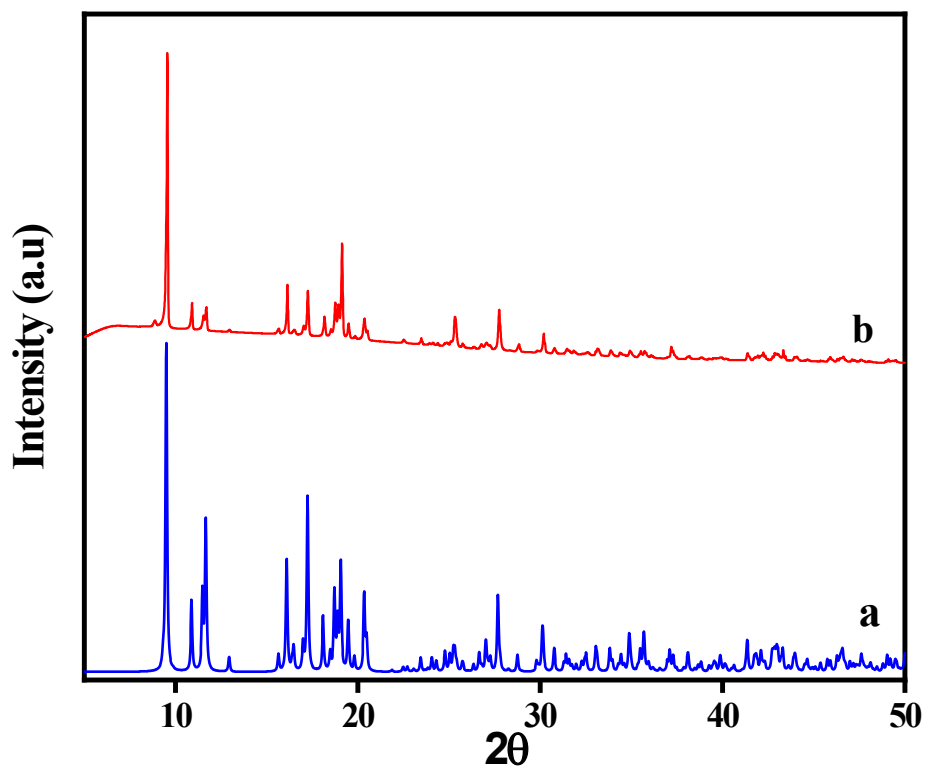

Fig. S3. Powder XRD (CuK $\alpha$ ) patterns of (a) simulated from single crystal X-ray data (b) experimental of  $[\text{Gd}(\text{3,5-pydc})_{1.5}(\text{CO}_2)_{0.5}(\text{H}_2\text{O})_4] \cdot 3\text{H}_2\text{O}$ , **1**.

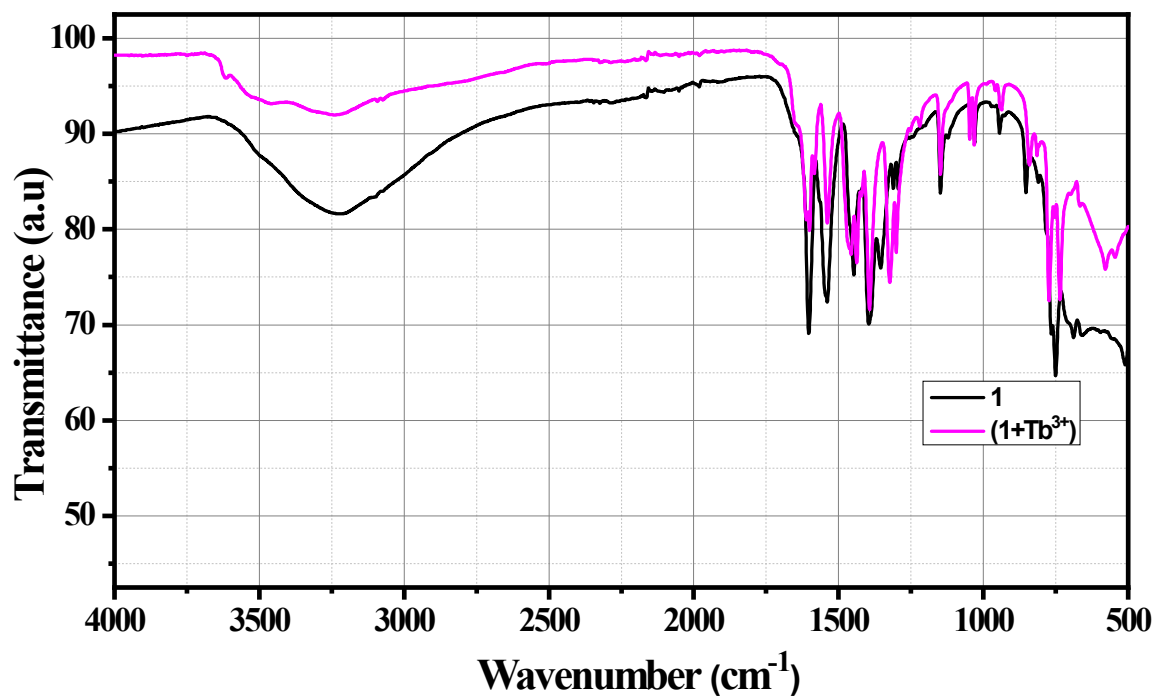

Fig. S4. FTIR spectra of compound **1** and **1+Tb<sup>3+</sup> (Tb@1)**.

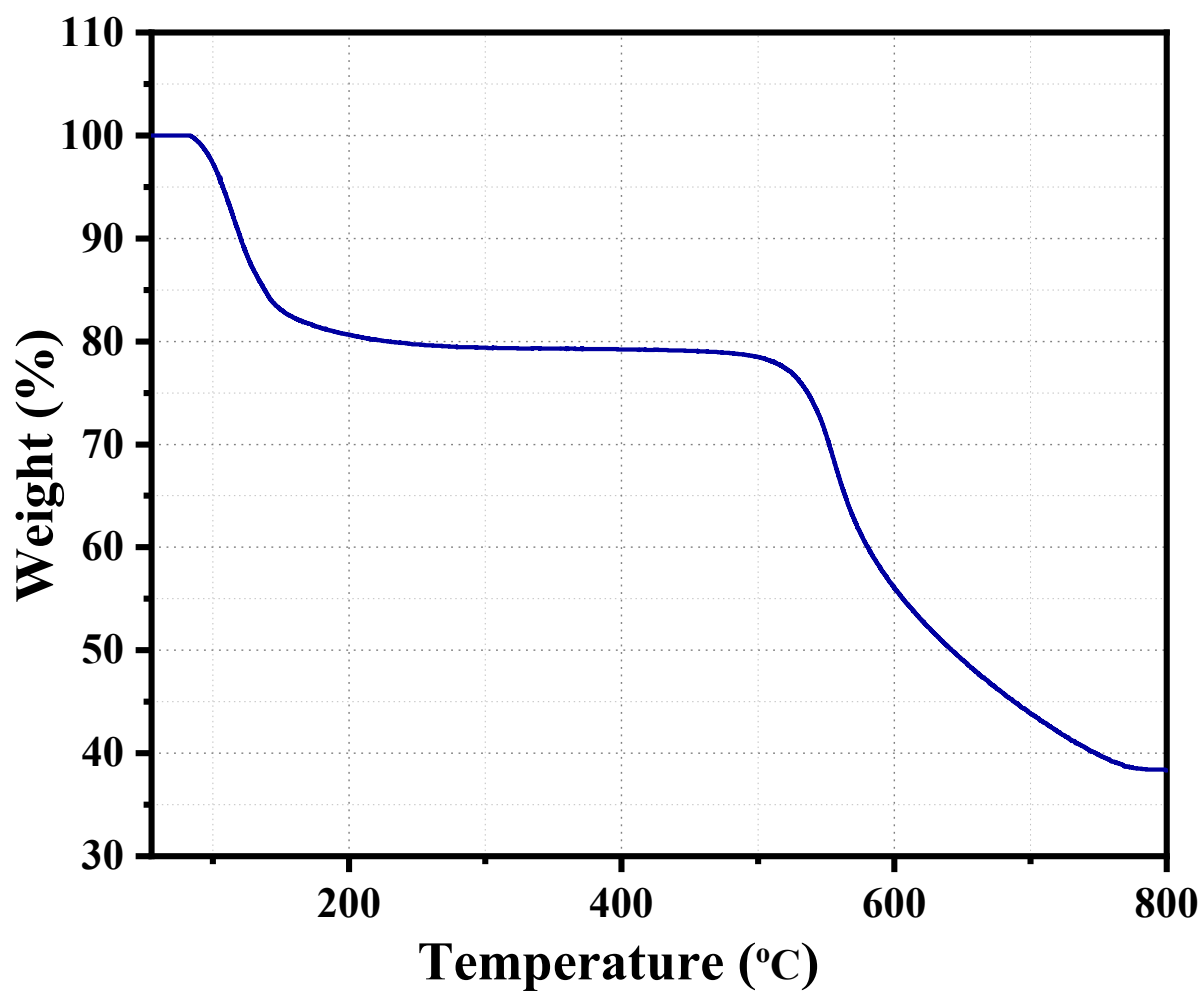

Fig. S5. Thermogravimetric analysis (TGA) of  $[\text{Gd}(\text{3,5-pydc})_{1.5}(\text{CO}_2)_{0.5}(\text{H}_2\text{O})_4] \cdot 3\text{H}_2\text{O}$ , **1**, in nitrogen atmosphere.

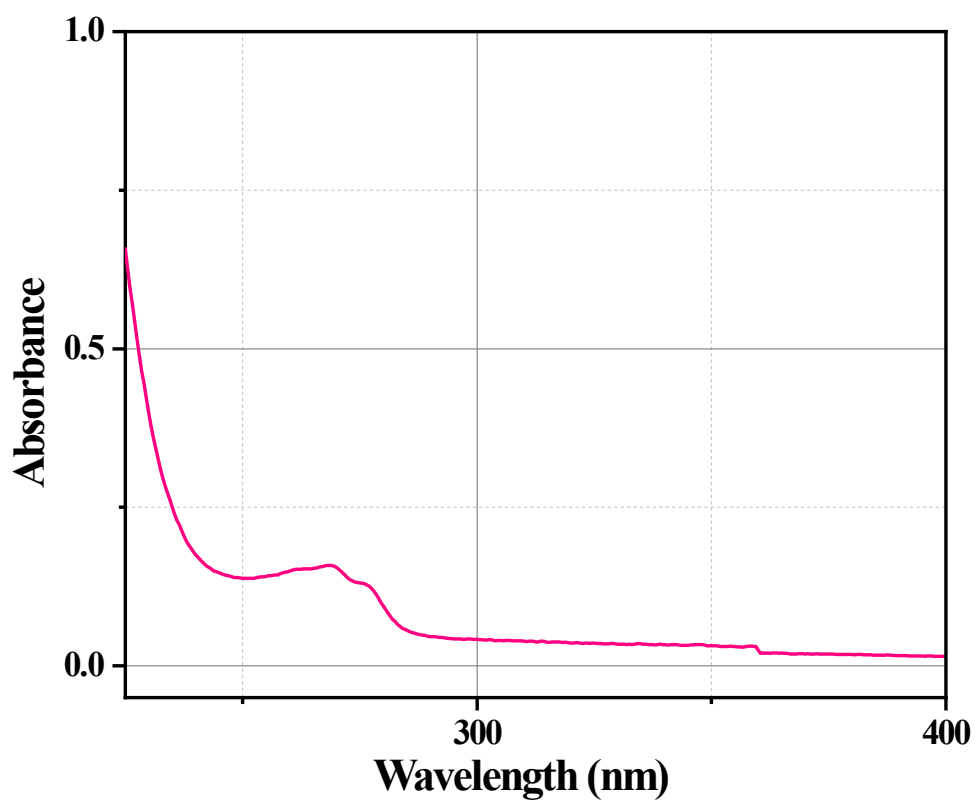

Fig. S6. Figure shows absorption spectrum of  $[\text{Gd}(\text{3,5-pydc})_{1.5}(\text{CO}_2)_{0.5}(\text{H}_2\text{O})_4] \cdot 3\text{H}_2\text{O}$ , **1**, dispersed in water.



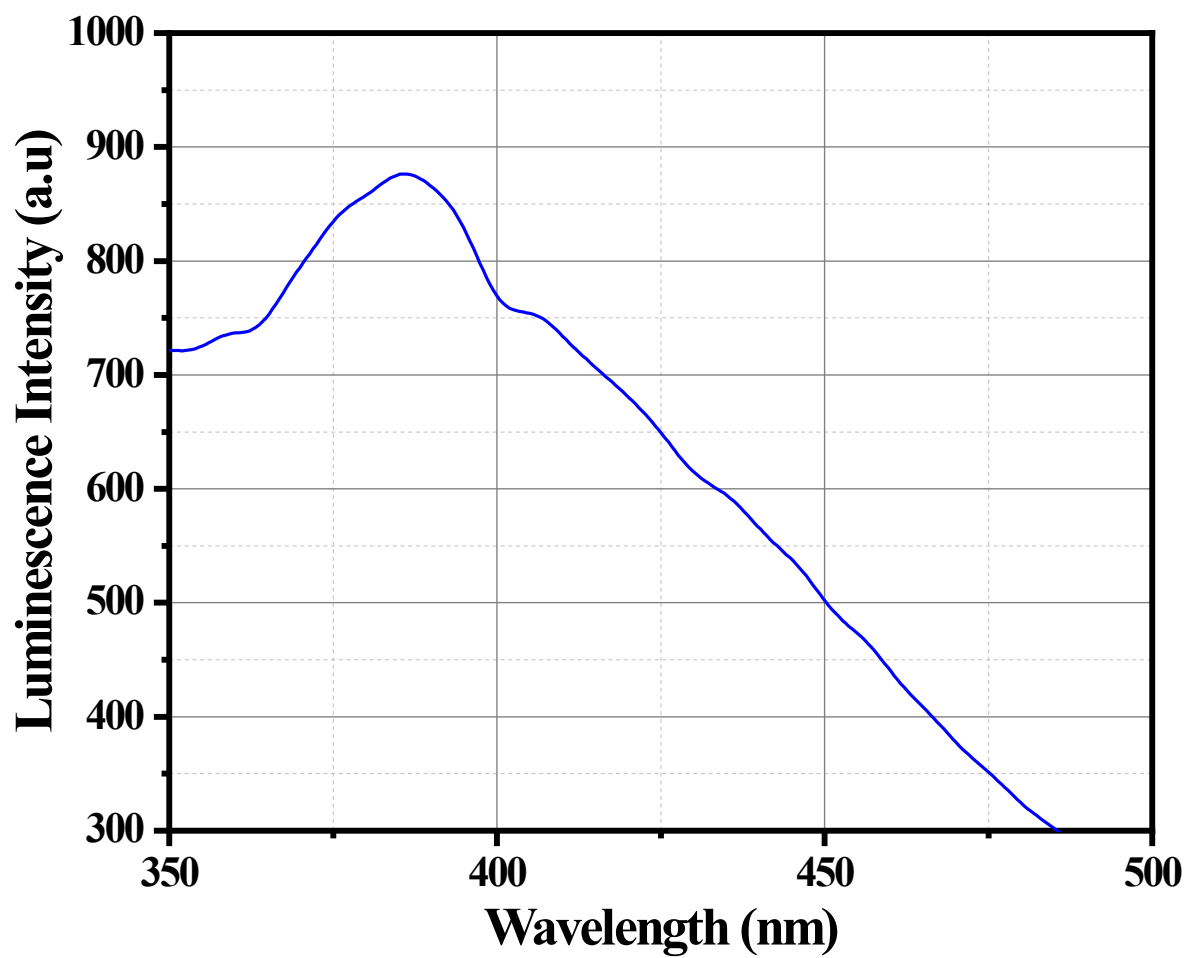

Fig. S7. Emission spectrum of  $[\text{Gd}(\text{3,5-pydc})_{1.5}(\text{CO}_2)_{0.5}(\text{H}_2\text{O})_4] \cdot 3\text{H}_2\text{O}$ , **1**, dispersed in water upon excitation at 270 nm.

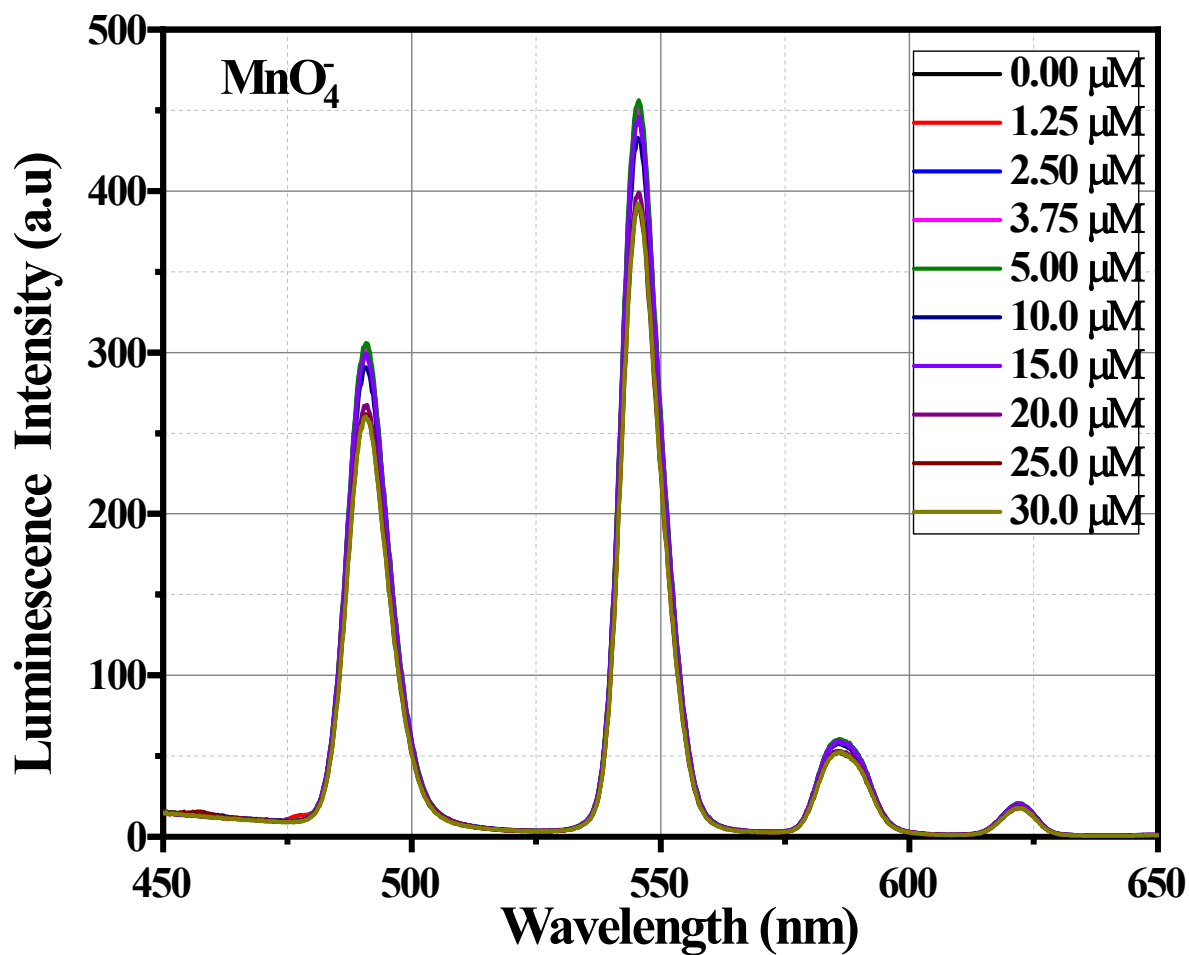

Fig. S8. Emission spectra of **Tb@1** dispersed in water upon the incremental addition of an aqueous solution of  $\text{MnO}_4^-$  ions ( $\lambda_{\text{ex}} = 270$  nm). The final concentration of  $\text{MnO}_4^-$  ions in the medium is indicated in the legend.

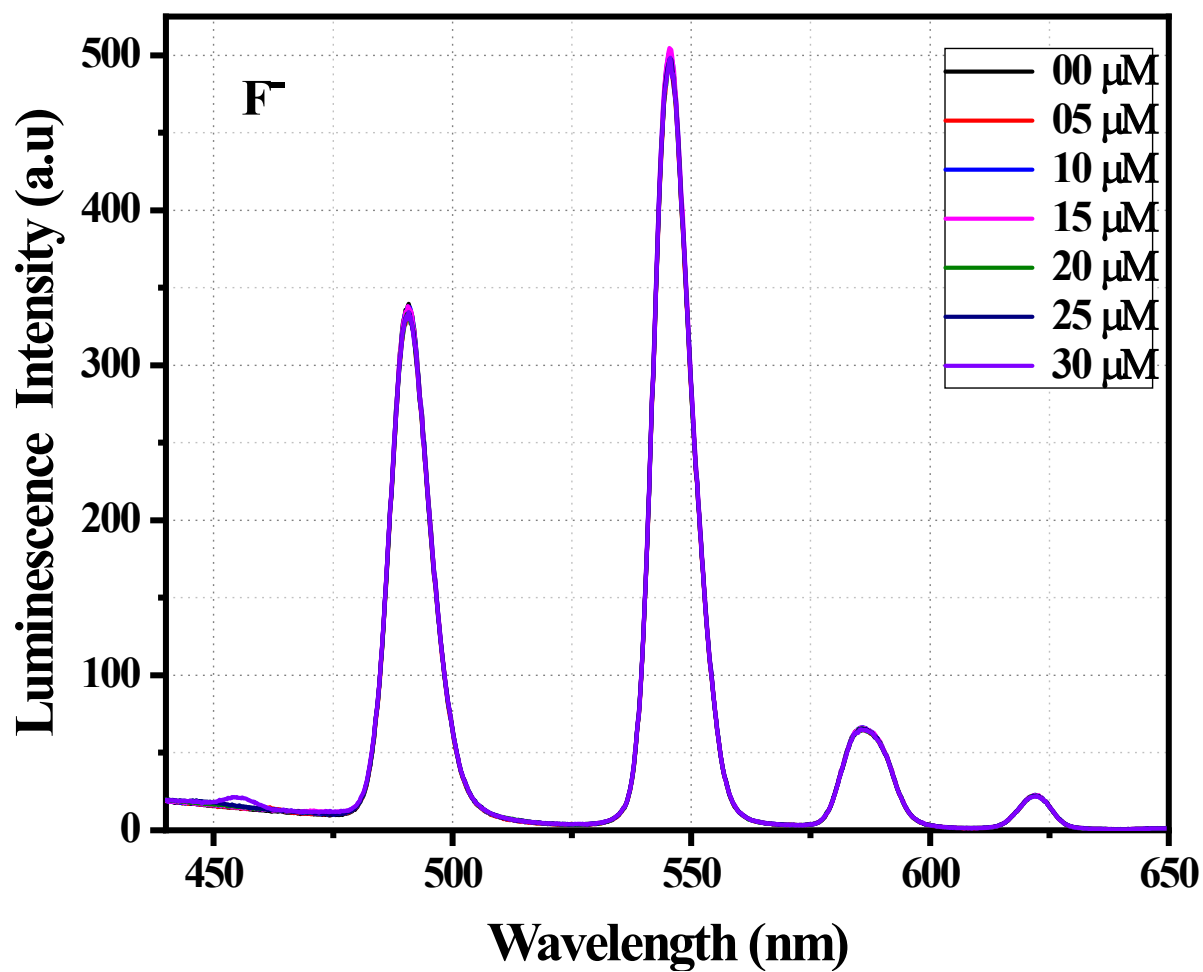

Fig. S9. Emission spectra of **Tb@1** dispersed in water upon the incremental addition of an aqueous solution of F<sup>-</sup> ions ( $\lambda_{\text{ex}} = 270$  nm). The final concentration of F<sup>-</sup> ions in the medium is indicated in the legend.

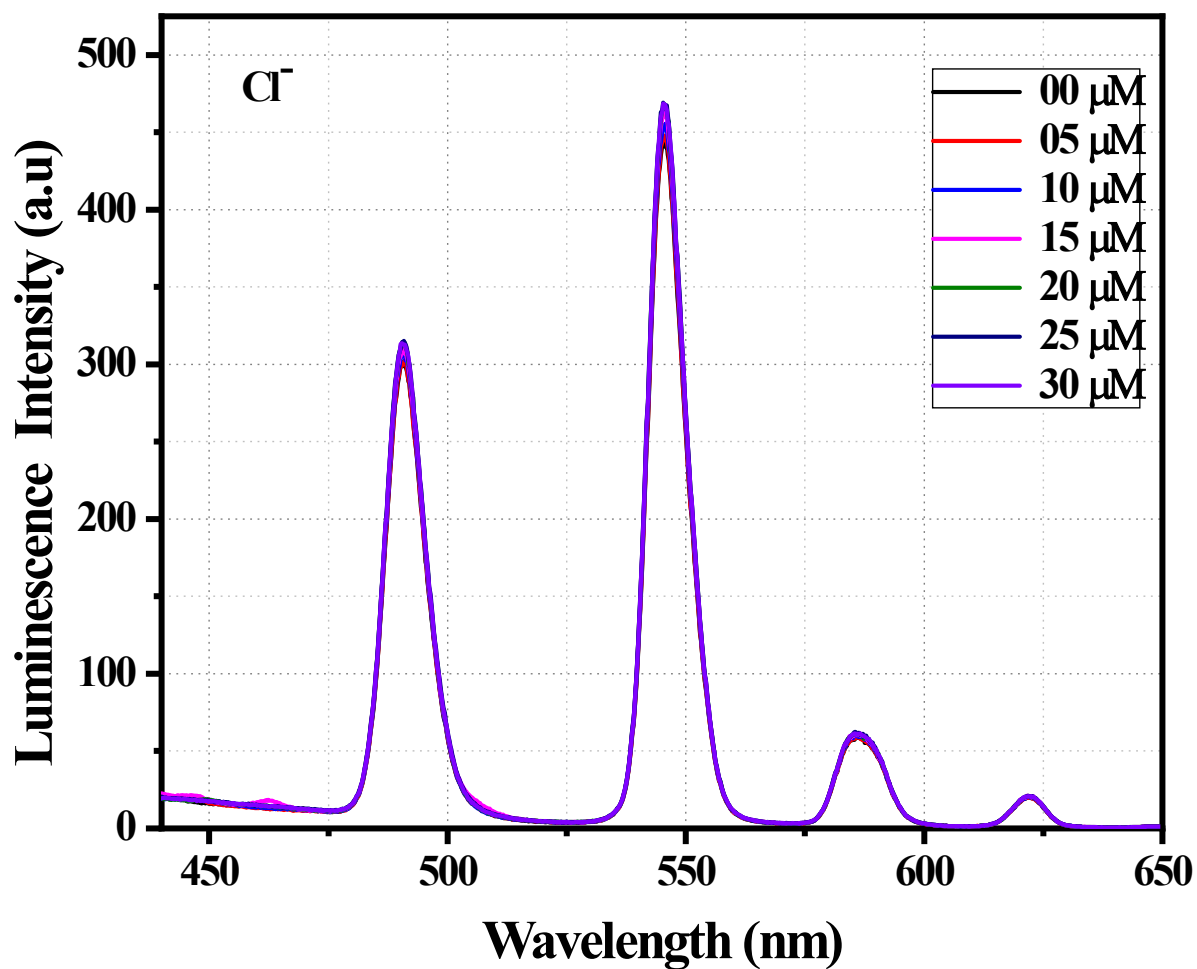

Fig. S10. Emission spectra of Tb@1 dispersed in water upon the incremental addition of an aqueous solution of Cl<sup>-</sup> ions ( $\lambda_{\text{ex}} = 270$  nm). The final concentration of Cl<sup>-</sup> ions in the medium is indicated in the legend.

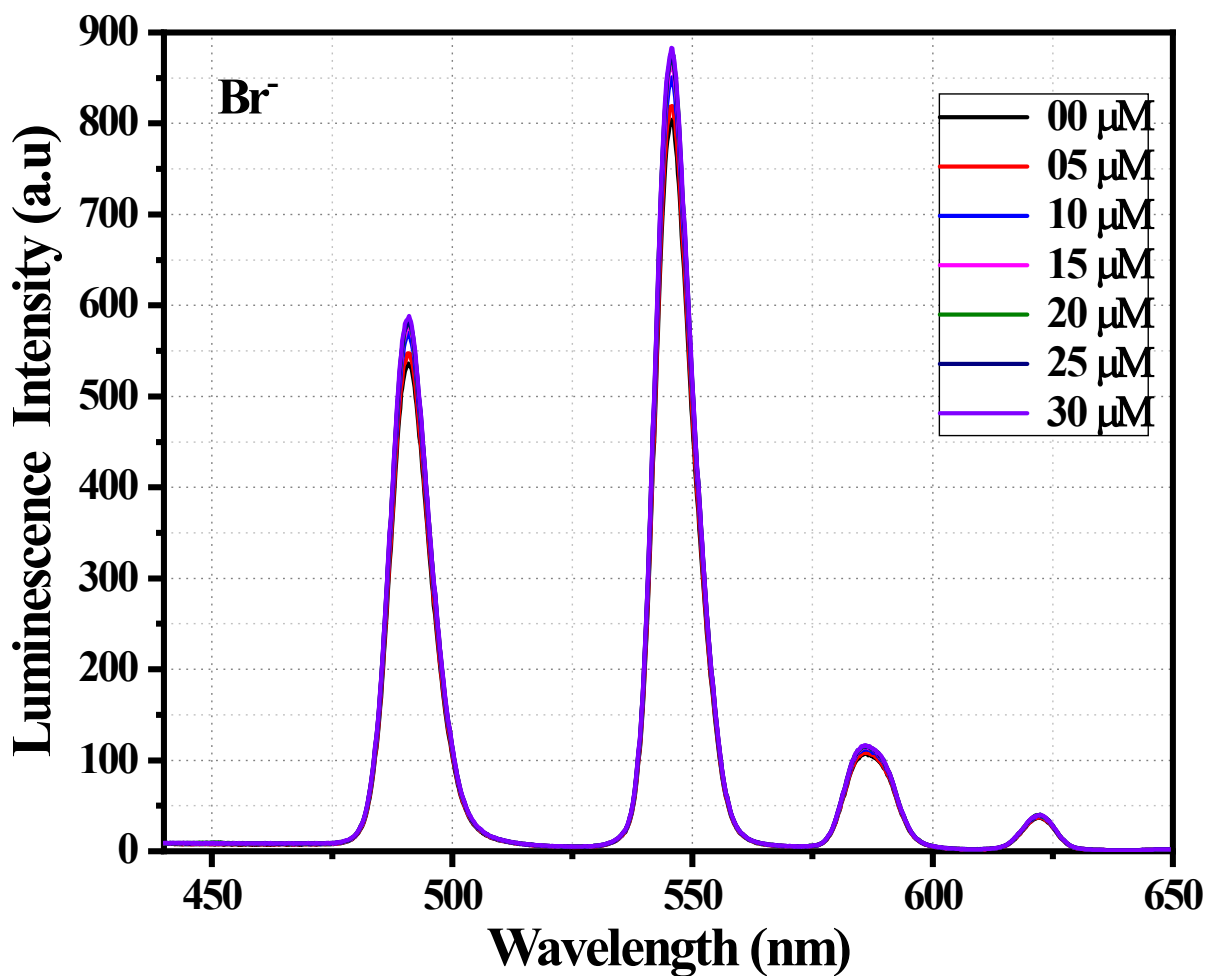

Fig. S11. Emission spectra of Tb@1 dispersed in water upon the incremental addition of an aqueous solution of Br<sup>-</sup> ions ( $\lambda_{\text{ex}} = 270$  nm). The final concentration of Br<sup>-</sup> ions in the medium is indicated in the legend.

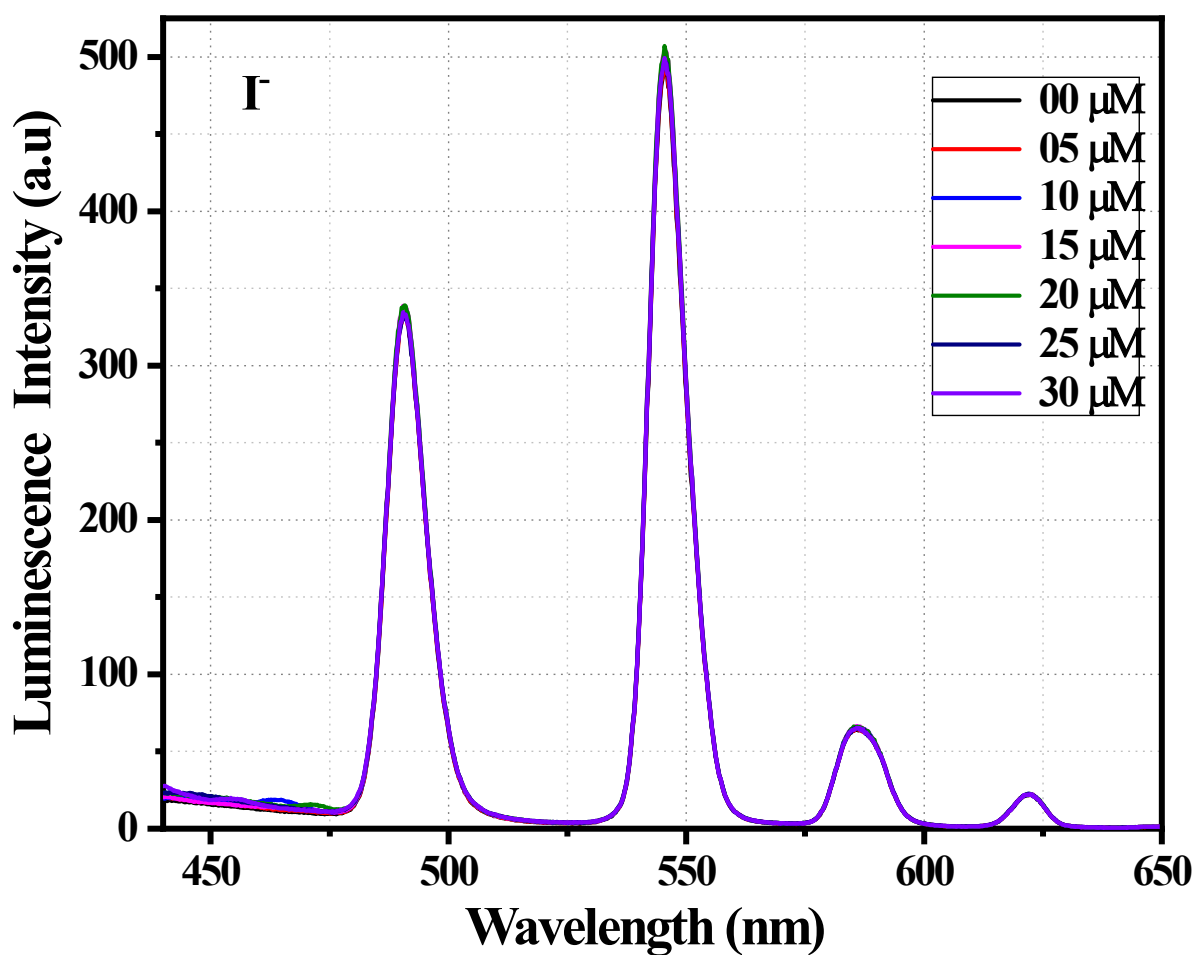

Fig. S12. Emission spectra of Tb@1 dispersed in water upon the incremental addition of an aqueous solution of I<sup>-</sup> ions ( $\lambda_{\text{ex}} = 270$  nm). The final concentration of I<sup>-</sup> ions in the medium is indicated in the legend.



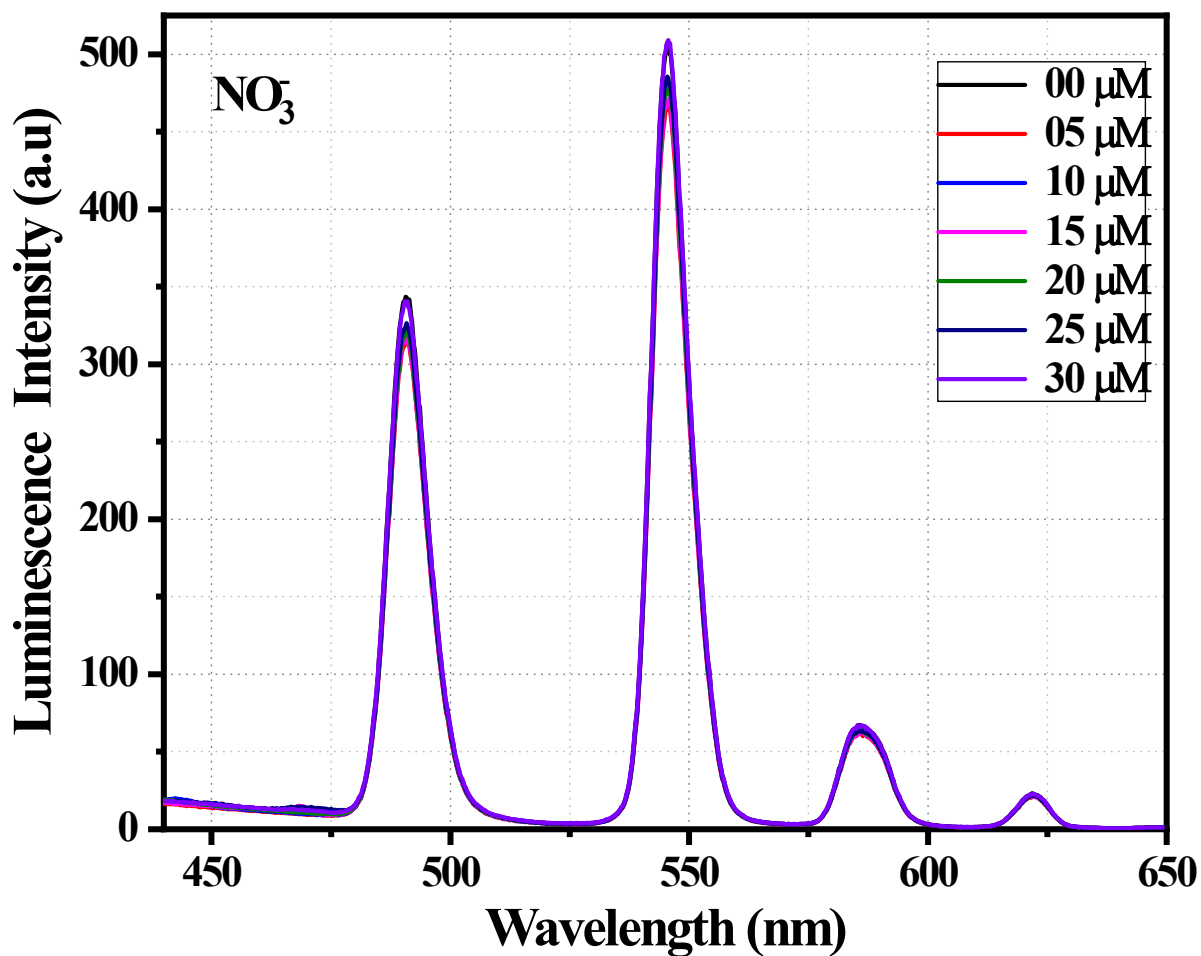

Fig. S13. Emission spectra of Tb@1 dispersed in water upon the incremental addition of an aqueous solution of NO<sub>3</sub><sup>-</sup> ions ( $\lambda_{\text{ex}} = 270$  nm). The final concentration of NO<sub>3</sub><sup>-</sup> ions in the medium is indicated in the legend.



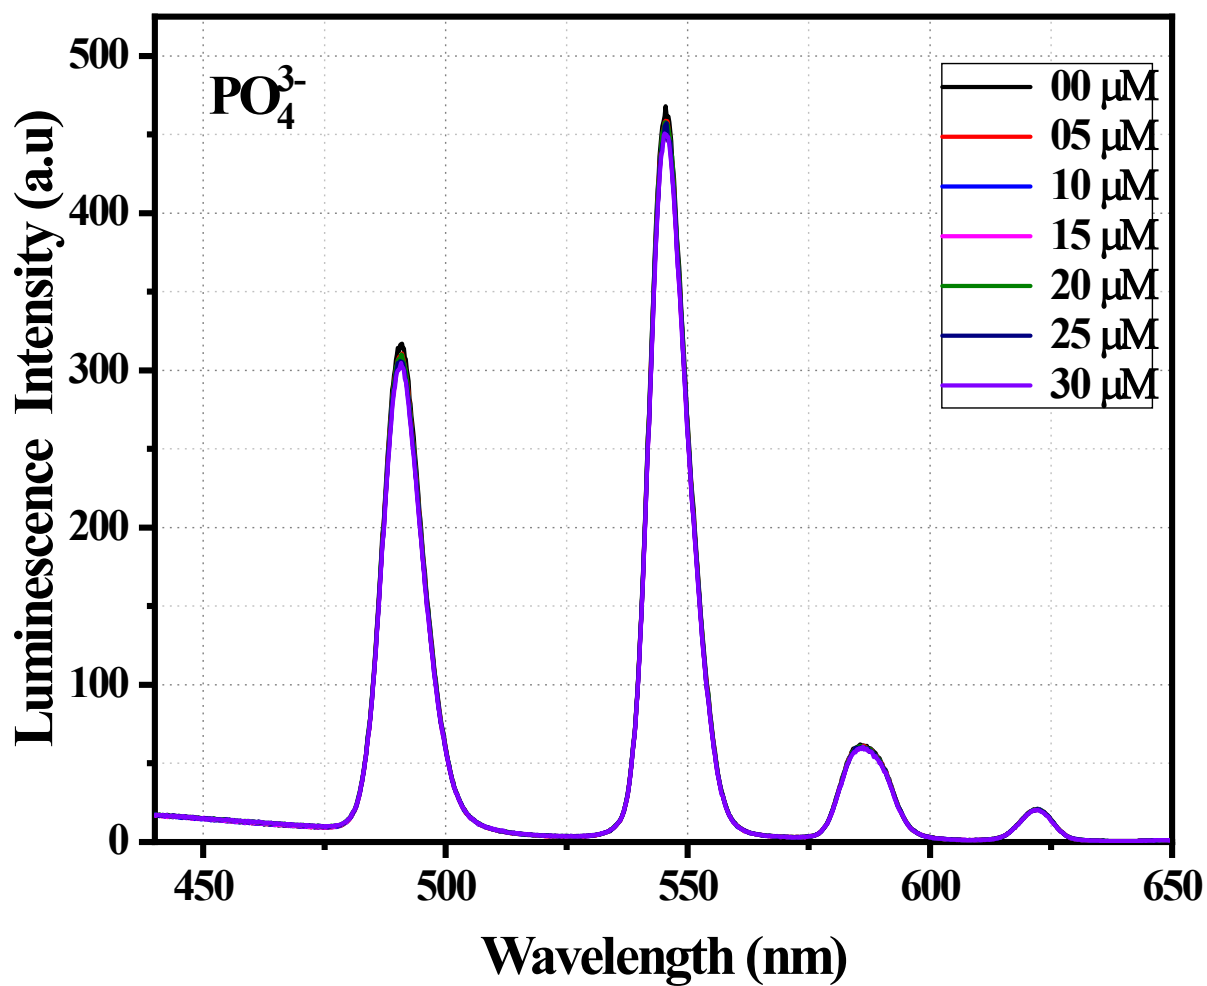

Fig.S14. Emission spectra of **Tb@1** dispersed in water upon the incremental addition of an aqueous solution of PO<sub>4</sub><sup>3-</sup> ions ( $\lambda_{\text{ex}} = 270$  nm). The final concentration of PO<sub>4</sub><sup>3-</sup> ions in the medium is indicated in the legend.



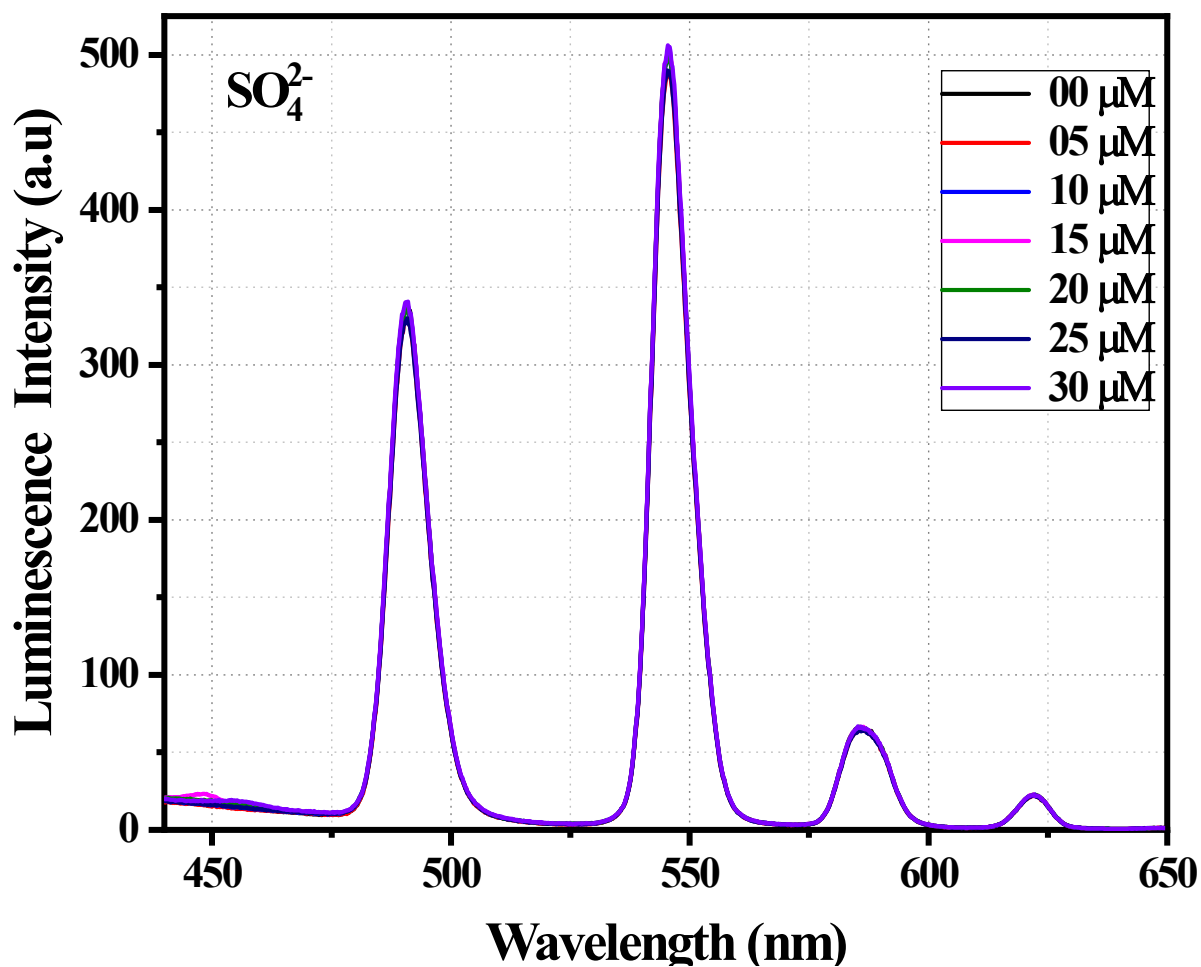

Fig. S15. Emission spectra of **Tb@1** dispersed in water upon the incremental addition of an aqueous solution of  $\text{SO}_4^{2-}$  ions ( $\lambda_{\text{ex}} = 270 \text{ nm}$ ). The final concentration of  $\text{SO}_4^{2-}$  ions in the medium is indicated in the legend.

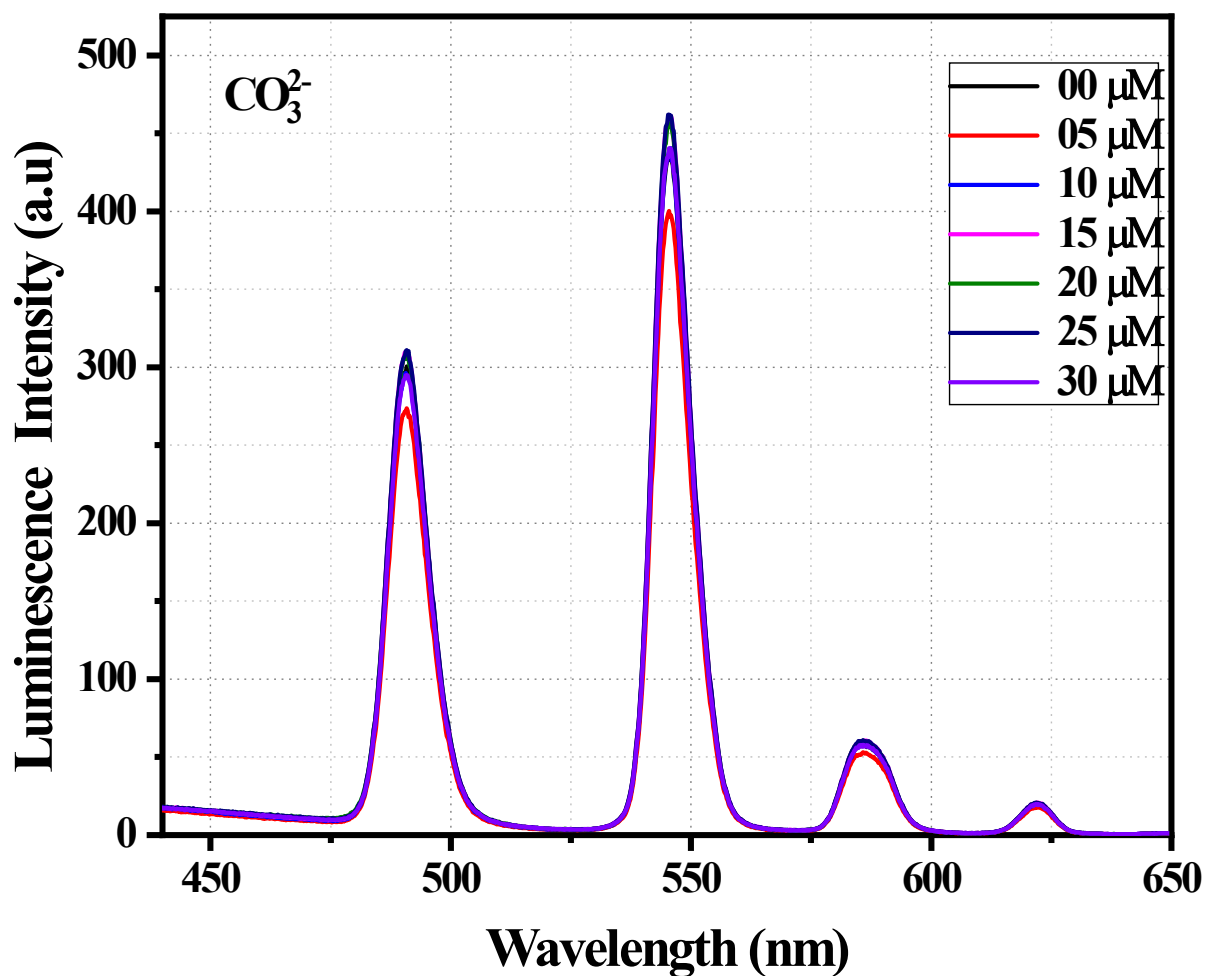

Fig. S16. Emission spectra of Tb@1 dispersed in water upon the incremental addition of an aqueous solution of CO<sub>3</sub><sup>2-</sup> ions ( $\lambda_{\text{ex}} = 270$  nm). The final concentration of CO<sub>3</sub><sup>2-</sup> ions in the medium is indicated in the legend.

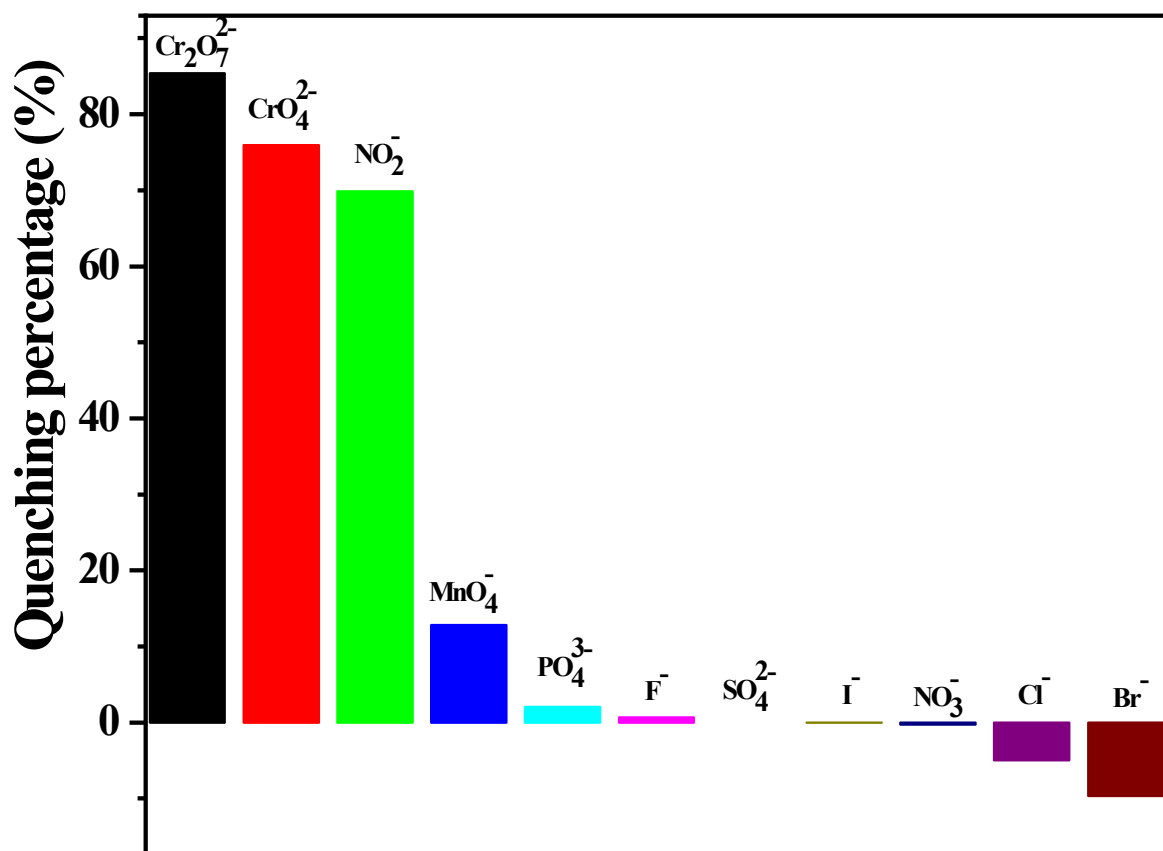

Fig. S17. Quenching efficiency of Tb@1 toward different anions after the addition of 30  $\mu$ M of these anions.

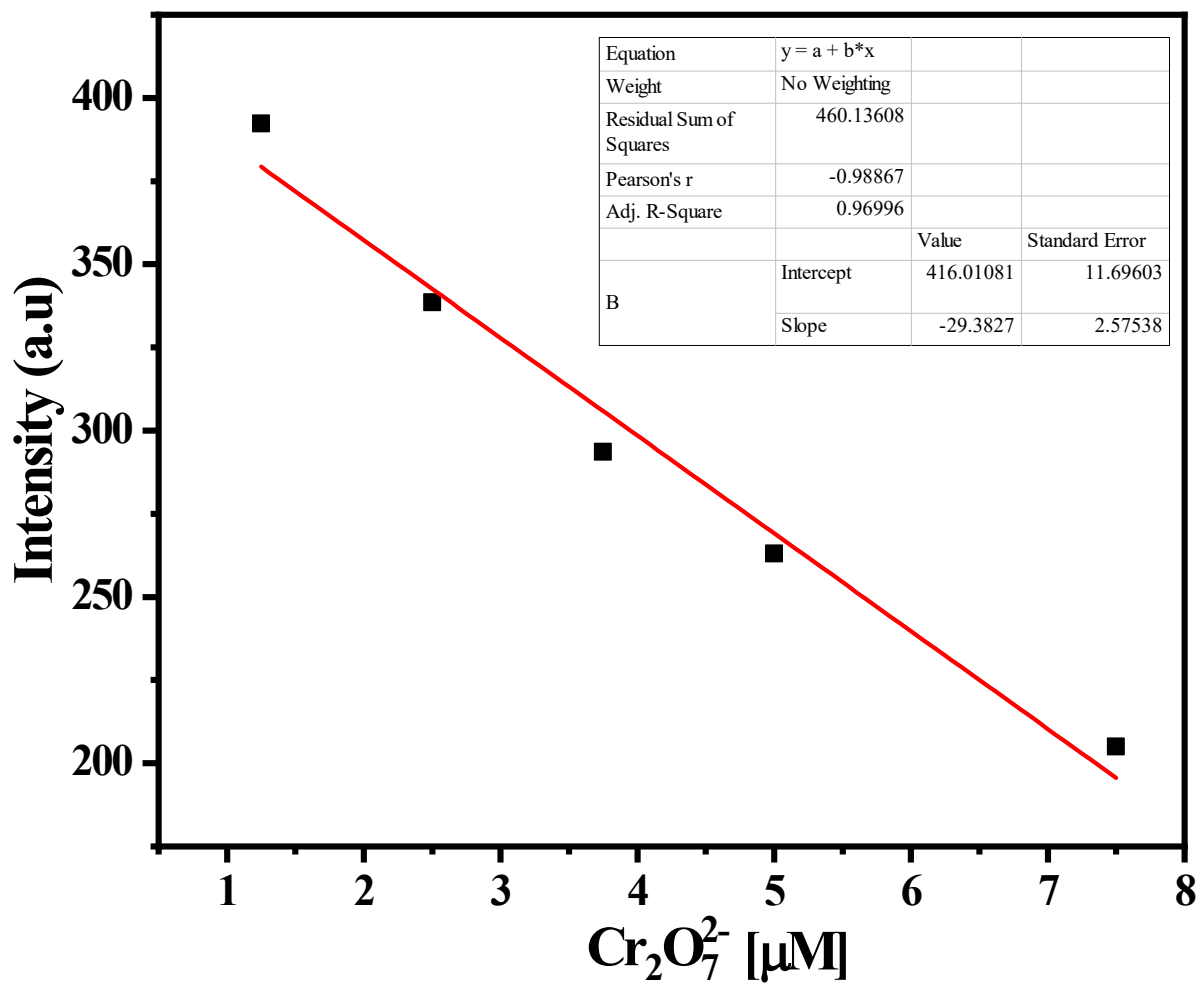

Fig. S18. Linear correlation between the luminescence intensity and concentration of dichromate anion ( $\text{Cr}_2\text{O}_7^{2-}$ ).



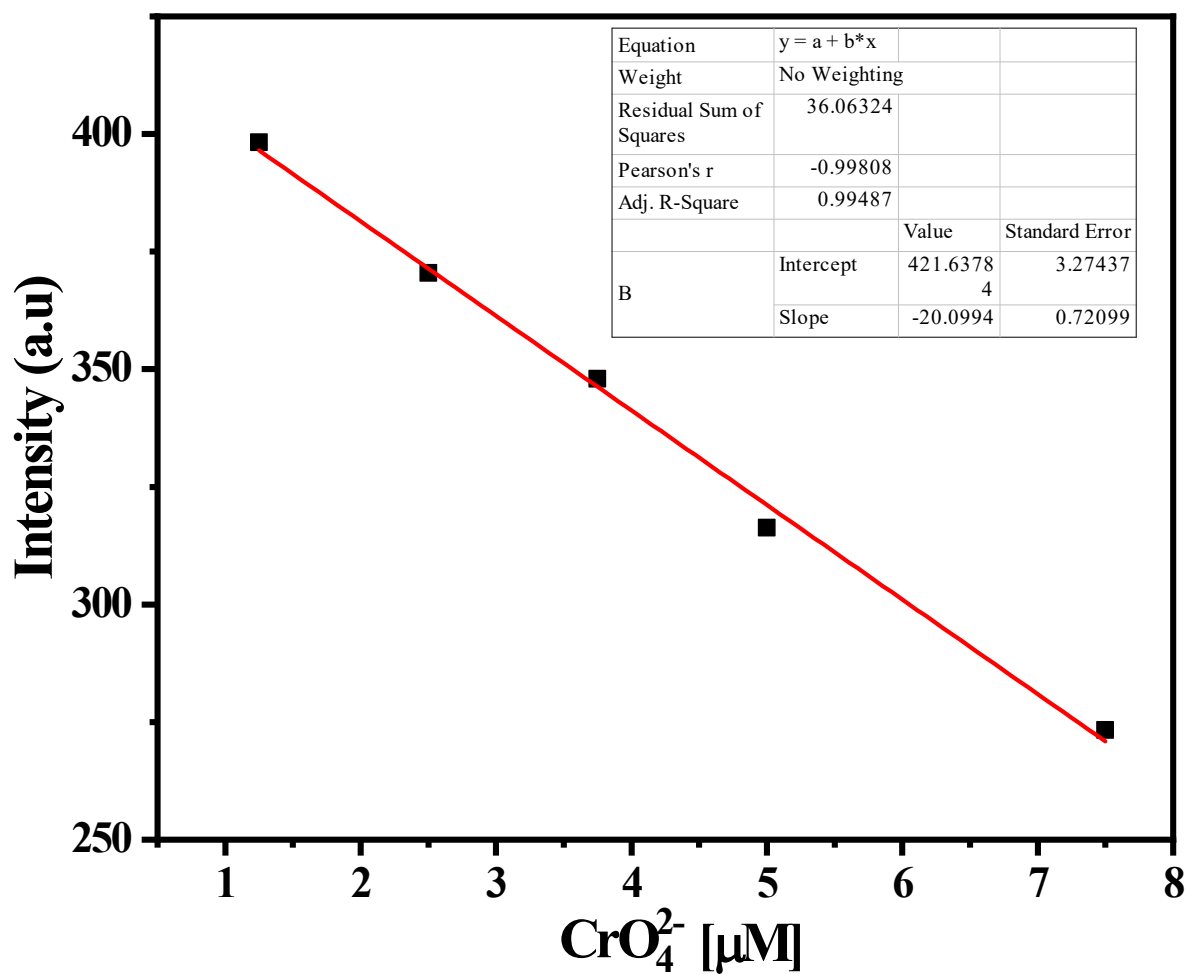

Fig. S19. Linear correlation between the luminescence intensity and concentration of chromate anion ( $\text{CrO}_4^{2-}$ ).





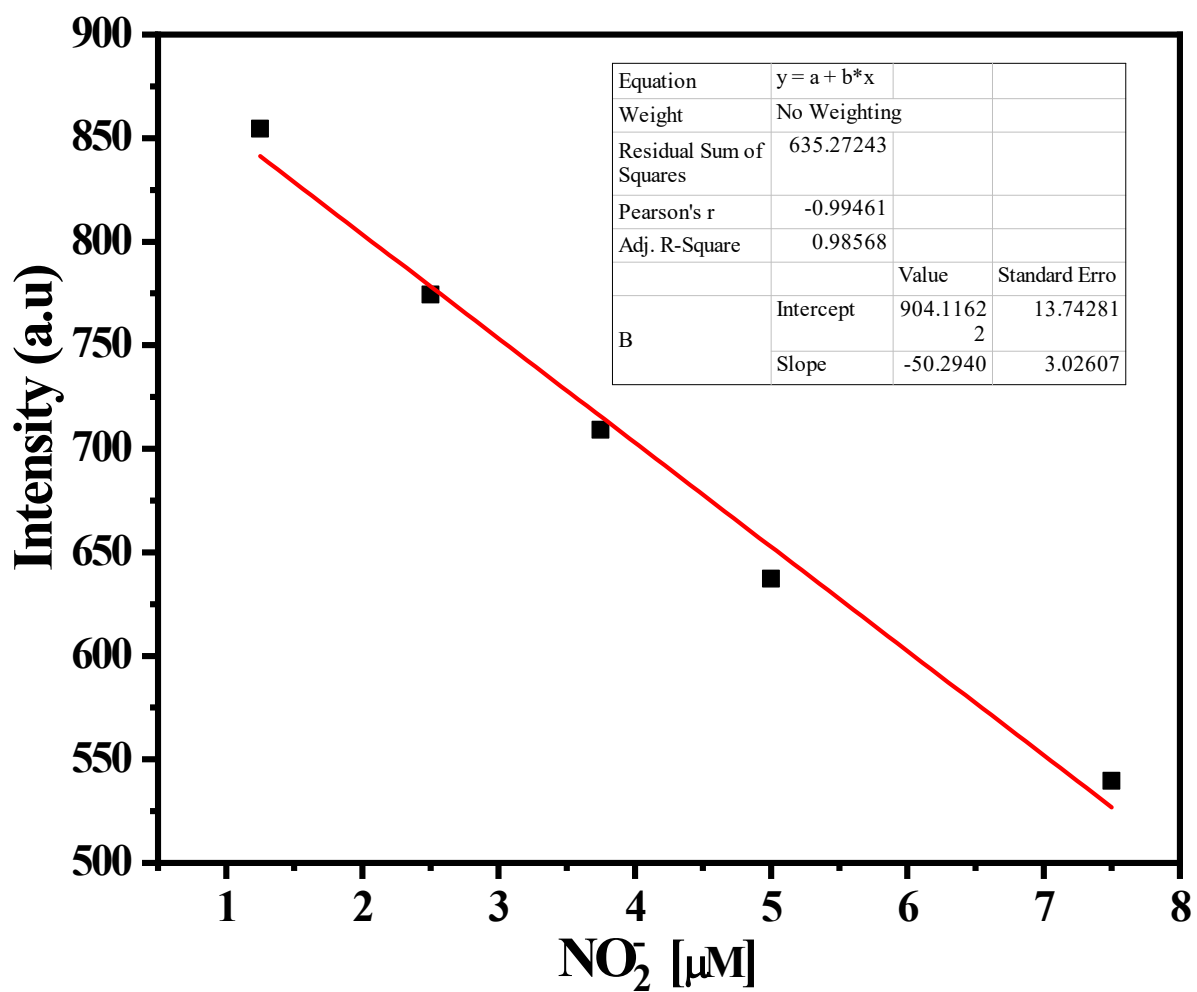

Fig. S20. Linear correlation between the luminescence intensity and concentration of anion ( $\text{NO}_2^-$ ).

The limit of detection (LOD) was calculated by the following equation,  $LOD = 3\sigma/m$ , where  $\sigma$  denotes the standard deviation of the luminescence intensity (at 546 nm) of 1a without any analytes and  $m$  represents the slope of the plot of luminescence intensity data vs concentration of anions.

Table S2: Calculation of standard deviation and Limit of Detection (LOD) for  $Cr_2O_7^{2-}$ ,  $CrO_4^{2-}$  and  $NO_2^-$  :

| Blank Reading (only Composite) | Luminescence intensity at 546 nm ( $X$ ) | Mean ( $\bar{x}$ ) | Standard Deviation( $\sigma$ ) |
|--------------------------------|------------------------------------------|--------------------|--------------------------------|
| Reading 1                      | 788.4                                    | 795.6              | 4.9042                         |
| Reading 2                      | 792.6                                    |                    |                                |
| Reading 3                      | 795.7                                    |                    |                                |
| Reading 4                      | 798.6                                    |                    |                                |
| Reading 5                      | 802.7                                    |                    |                                |

Slope,  $m$  for  $Cr_2O_7^{2-}$  = 29.3827

Slope,  $m$  for  $CrO_4^{2-}$  = 20.0994

Slope,  $m$  for  $NO_2^-$  = 50.2940

$LOD$  for  $Cr_2O_7^{2-}$  =  $3\sigma/m = (3 \times 4.9042)/29.3827 = 0.5007 \mu M = 147.306$  ppb

$LOD$  for  $CrO_4^{2-}$  =  $3\sigma/m = (3 \times 4.9042)/20.0994 = 0.7319 \mu M = 142.150$  ppb

$LOD$  for  $NO_2^-$  =  $3\sigma/m = (3 \times 4.9042)/50.2940 = 0.2925 \mu M = 20.183$  ppb



Fig. S21.  $K_{SV}$  curves of **Tb@1** in an aqueous solution in the presence of all the studied anions.

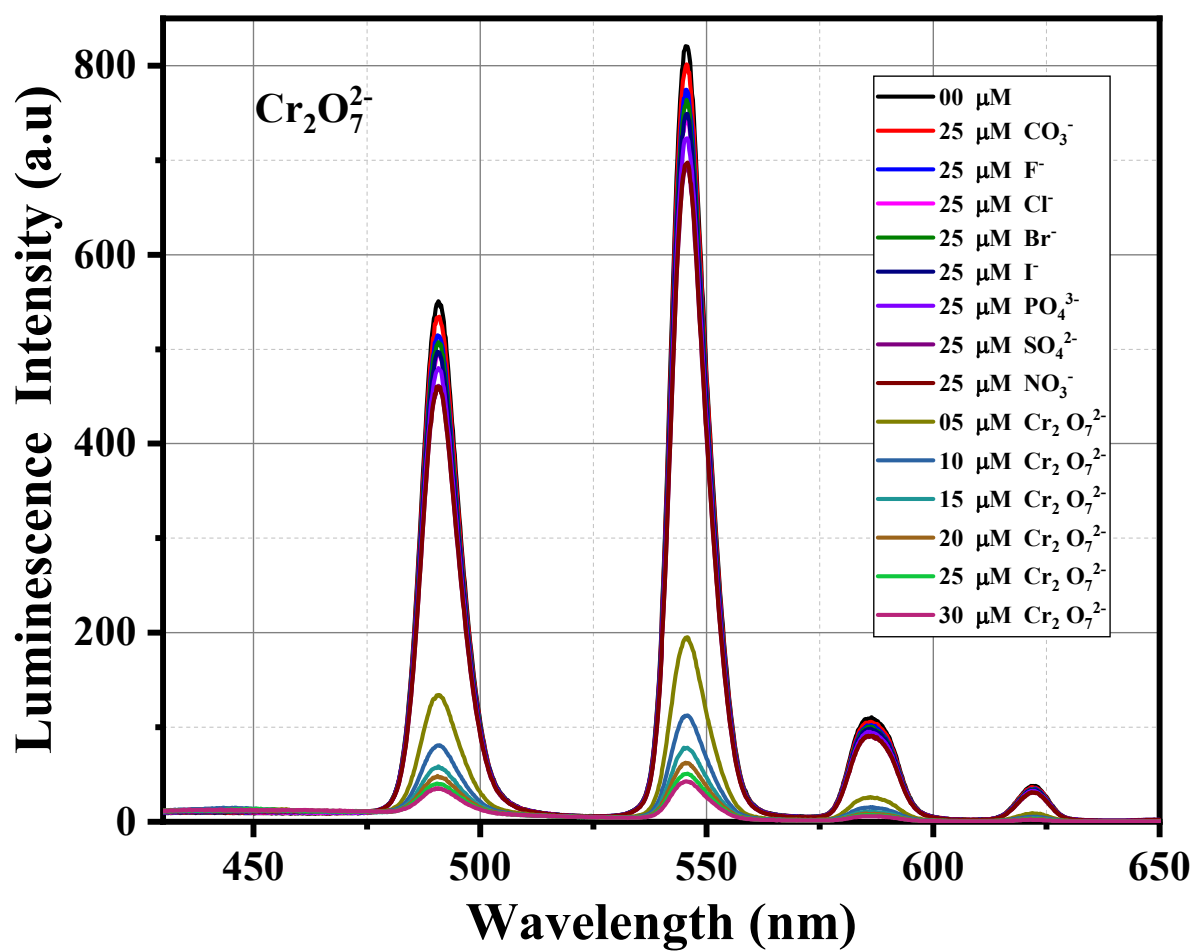

Fig. S22a. Emission spectra of **Tb@1** in water dispersion upon the incremental addition of  $\text{Cr}_2\text{O}_7^{2-}$  solution in the presence of 25  $\mu\text{M}$  of different anion solution ( $\lambda_{\text{ex}} = 270 \text{ nm}$ ).

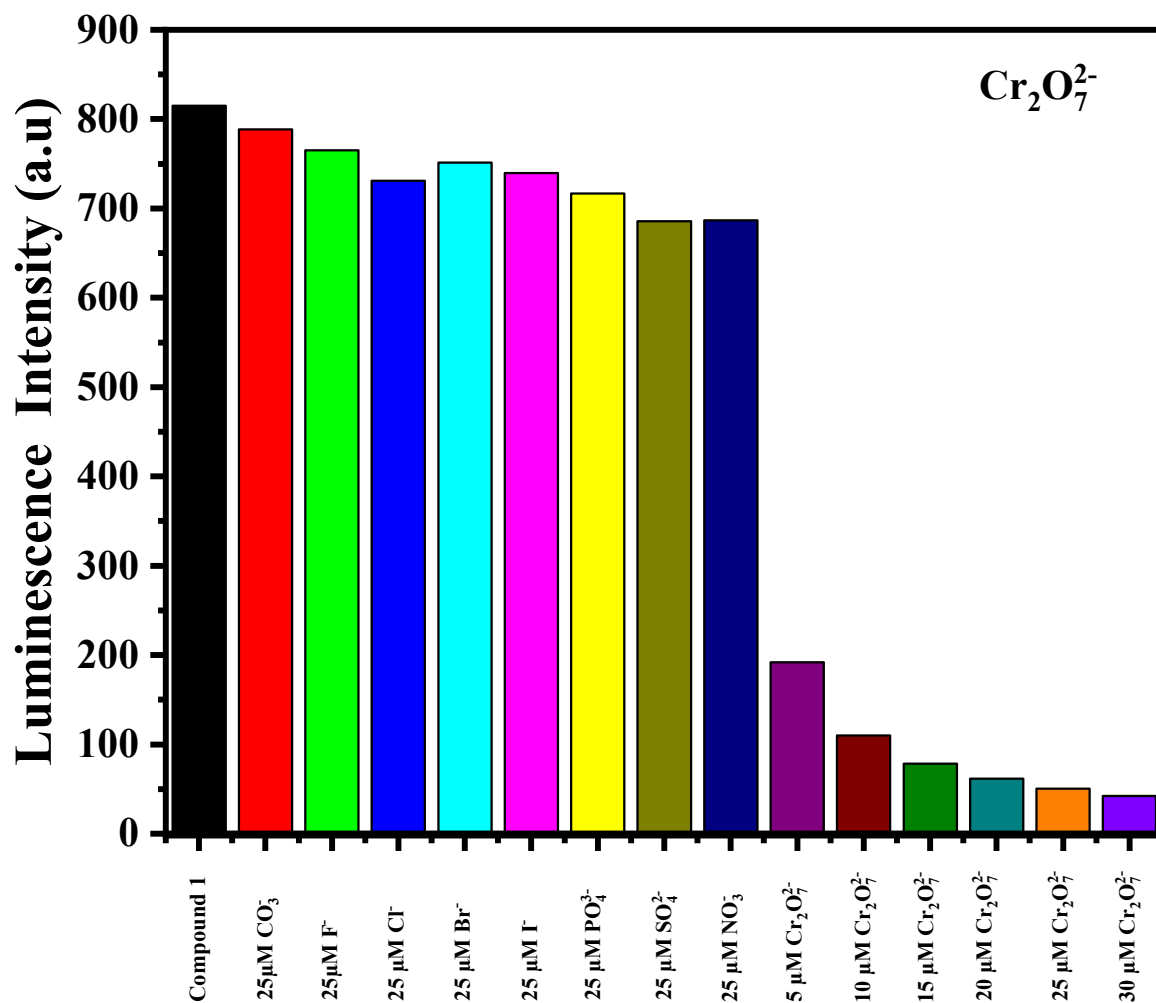

Fig. S22b. Corresponding bar diagram showing the luminescence intensity (monitored at 545 nm) after the sequential addition of the analytes.

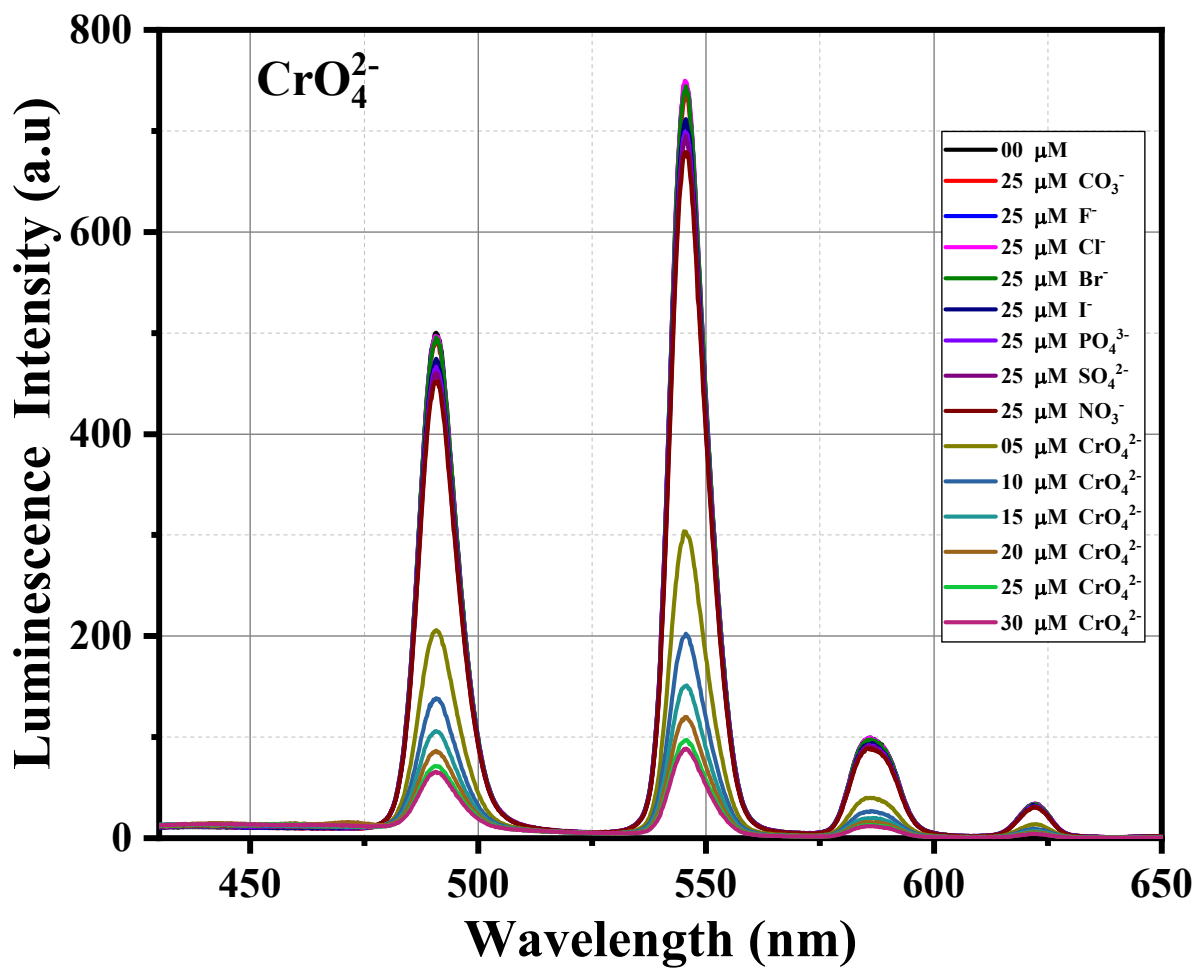

Fig. S23a. Emission spectra of composite in water dispersion upon the incremental addition of Cr O<sub>4</sub><sup>2-</sup> solution in the presence of 25 μM of different anion solution ( $\lambda_{\text{ex}} = 270 \text{ nm}$ ).



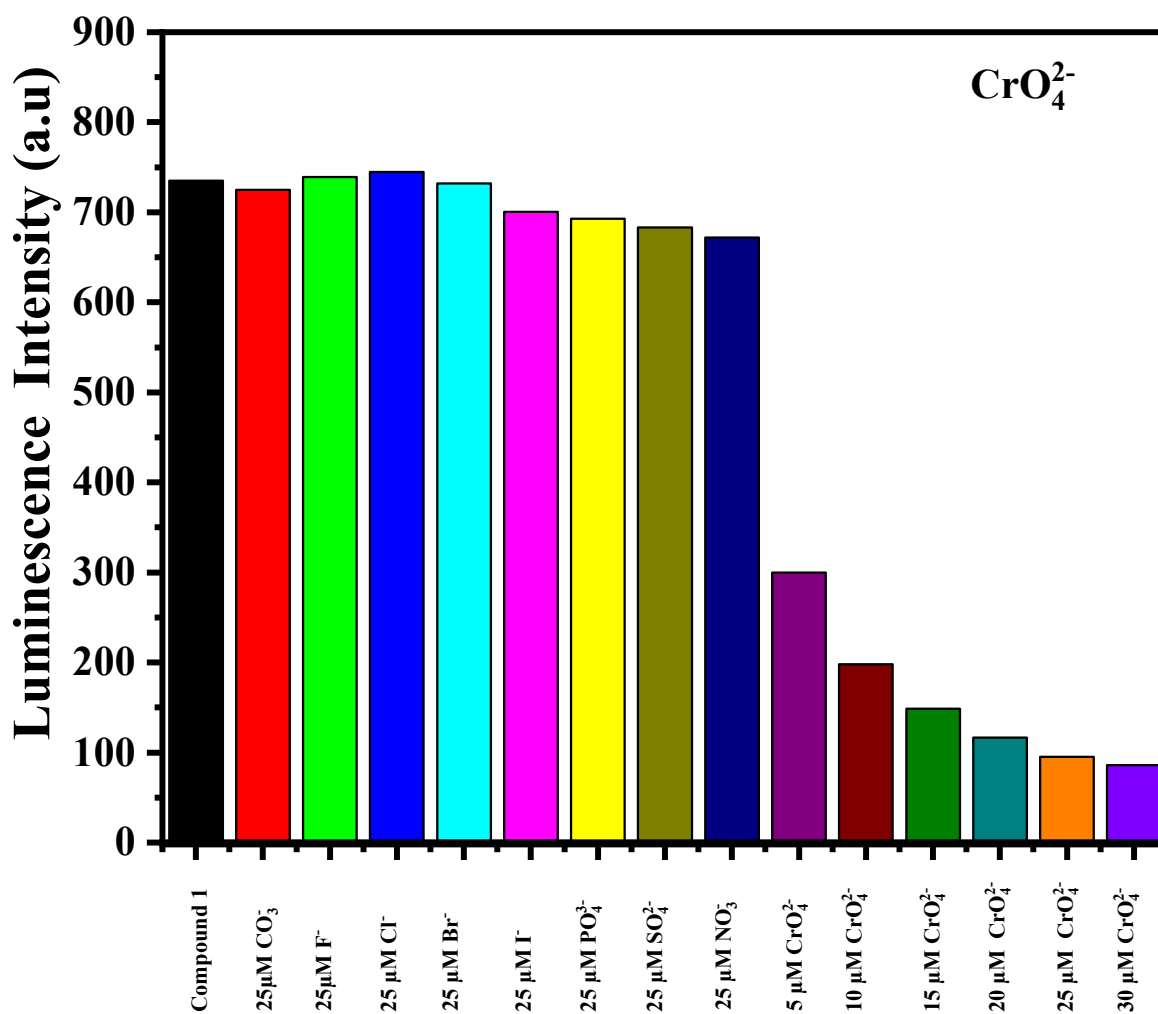

Fig. S23b. Corresponding bar diagram showing the luminescence intensity (monitored at 545 nm) after the sequential addition of the analytes.

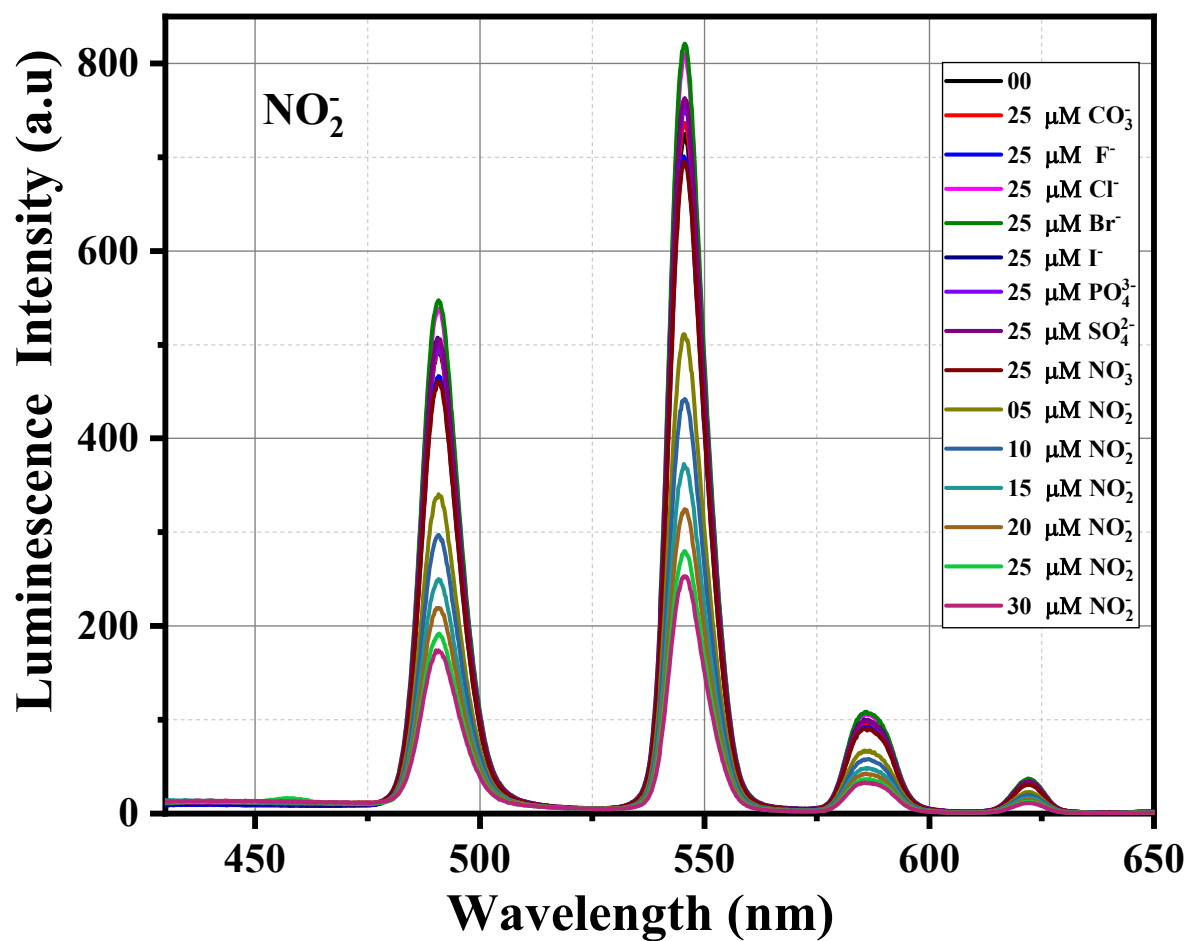

Fig. S24a. Emission spectra of composite in water dispersion upon the incremental addition of  $\text{NO}_2^-$  solution in the presence of 25  $\mu\text{M}$  of different anion solution ( $\lambda_{\text{ex}} = 270 \text{ nm}$ ).

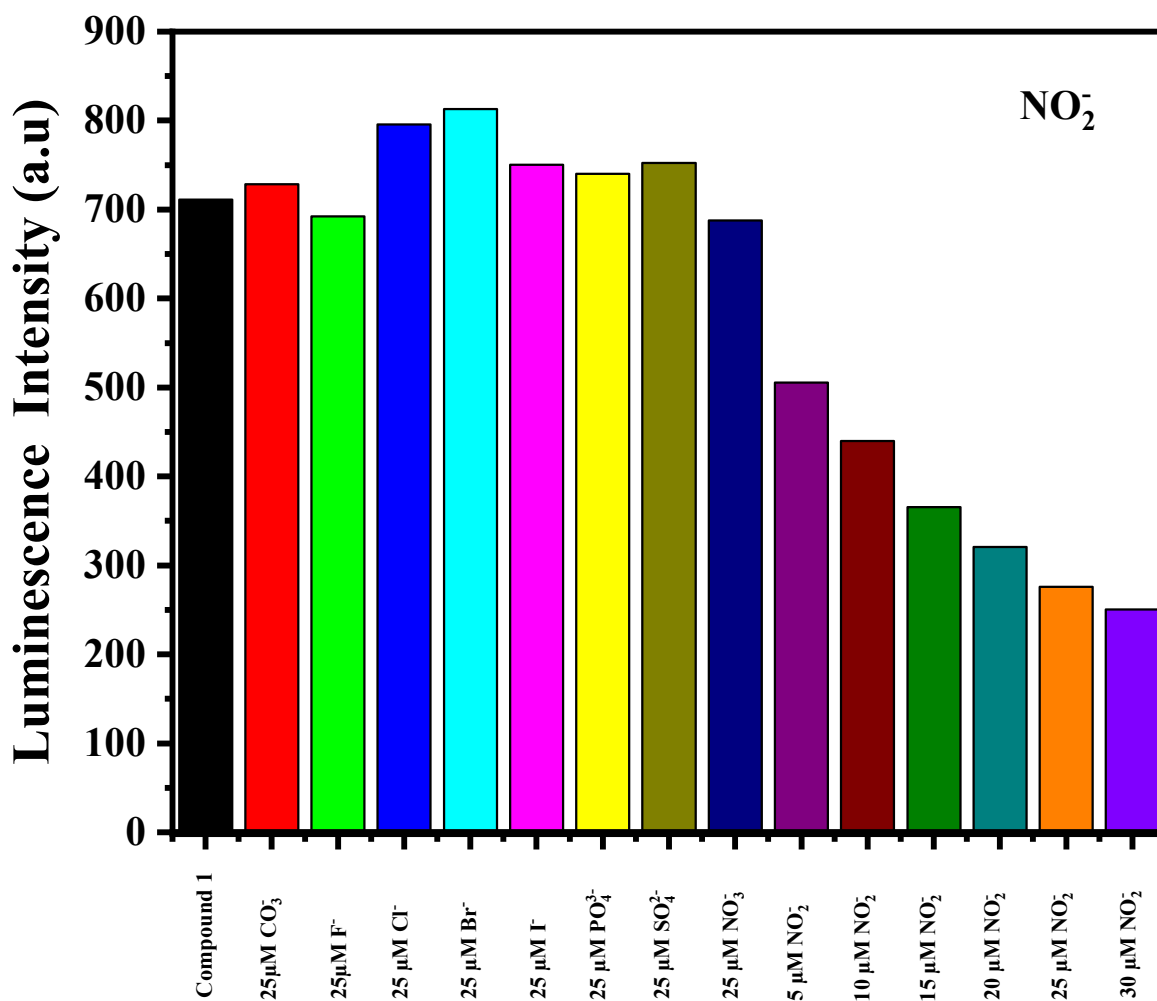

Fig. S24b. Corresponding bar diagram showing the luminescence intensity (monitored at 545nm) after the sequential addition of the analytes.

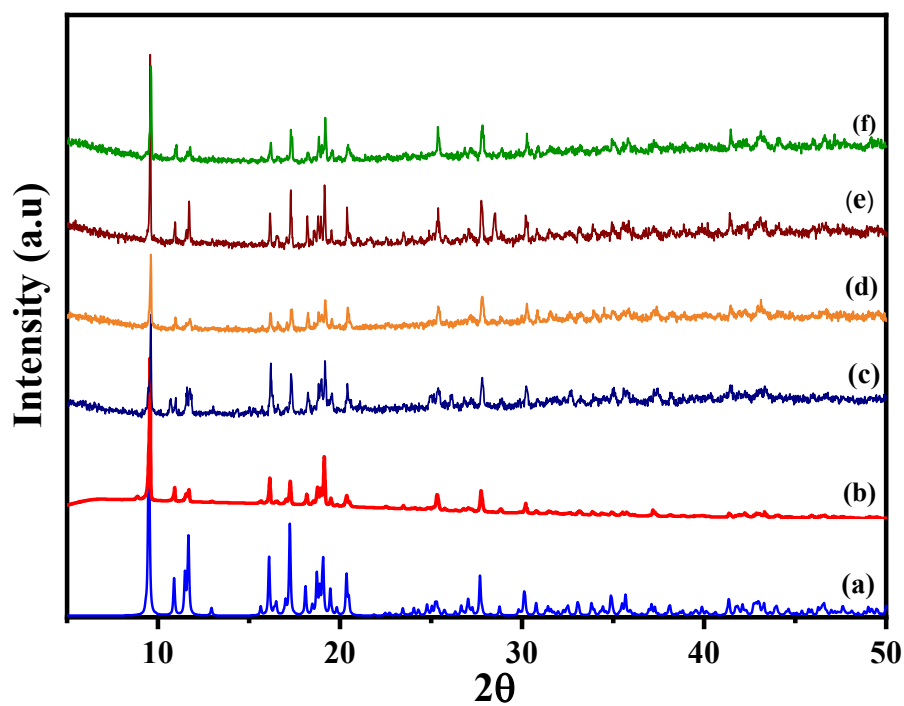

Fig. S25. The PXRD pattern of (a) Simulated of compound **1**, (b) Experimental of compound **1**, (c) compound **1** immersed in aqueous solution of  $\text{Tb}(\text{NO}_3)_3$  (composite **Tb@1**), (d) composite **Tb@1** immersed in an aqueous solution of  $\text{Cr}_2\text{O}_7^{2-}$ , (e) composite **Tb@1** immersed in an aqueous solution of  $\text{CrO}_4^{2-}$ , (f) composite **Tb@1** immersed in an aqueous solution of  $\text{NO}_2^-$ .

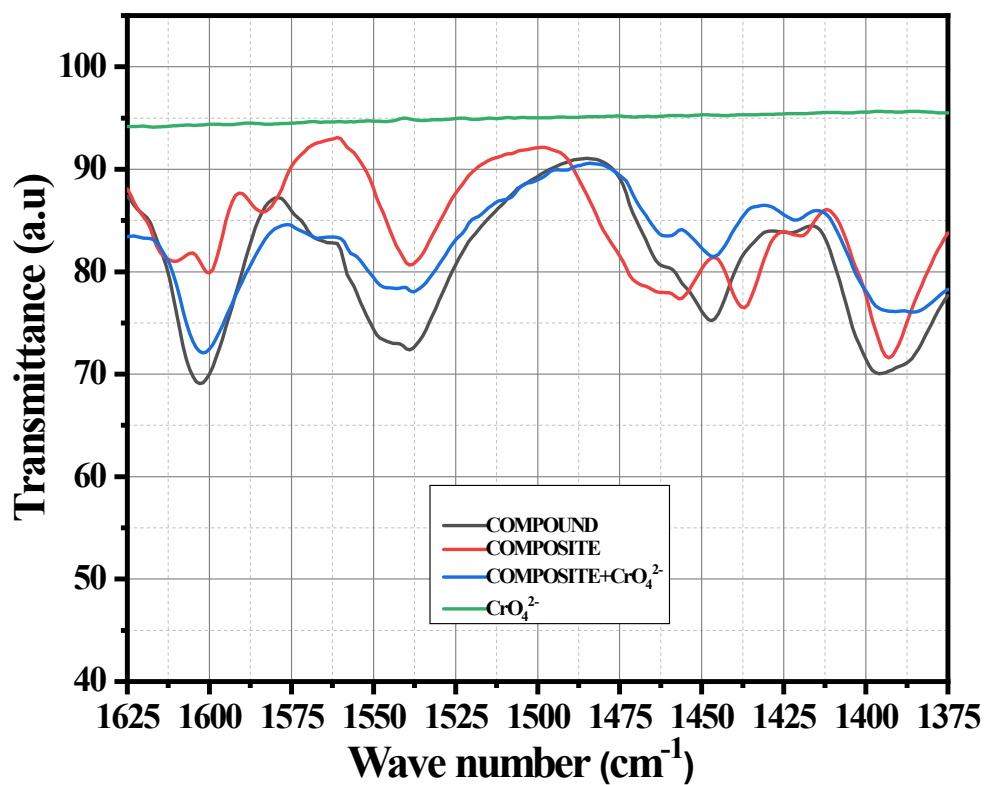

Fig. S26. FTIR spectra of compound **1**, composite (**Tb@1**), composite (**Tb@1**) + K<sub>2</sub>CrO<sub>4</sub> and pure K<sub>2</sub>CrO<sub>4</sub> in the range 1625 to 1375 cm<sup>-1</sup>.

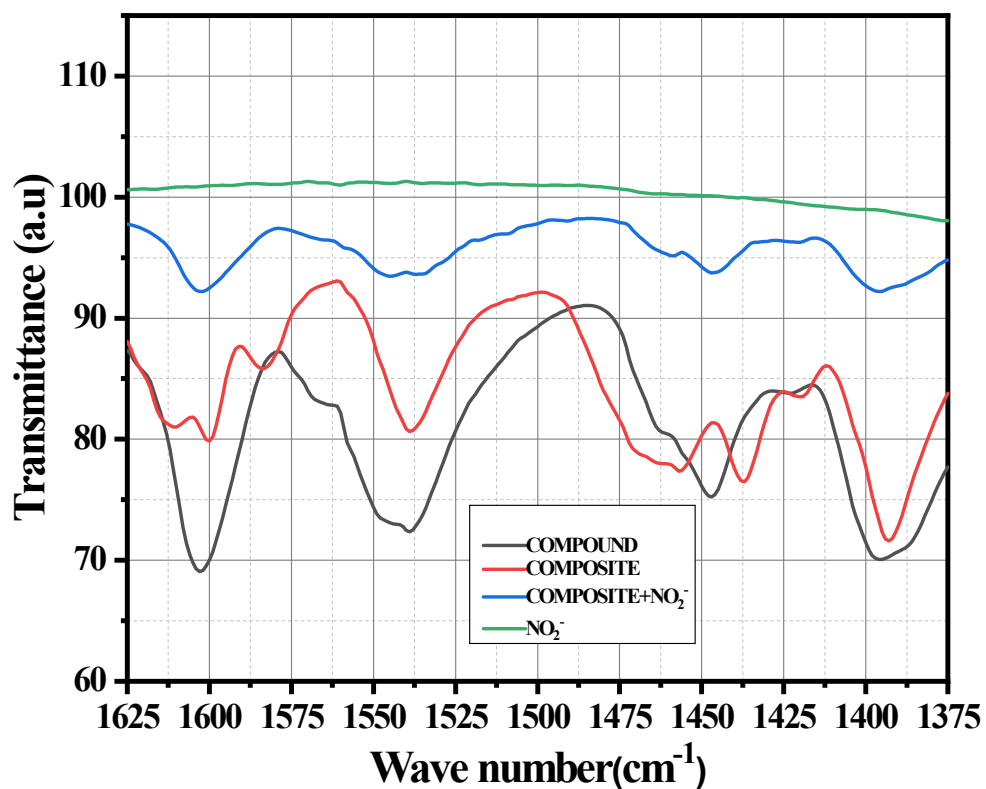

Fig. S27. FTIR spectra of compound **1**, composite (**Tb@1**), composite (**Tb@1**) + NaNO<sub>2</sub> and pure NaNO<sub>2</sub> in the range 1625 to 1375 cm<sup>-1</sup>.
